# Supplementary material for: A real-time proximity querying algorithm for haptic-based molecular docking
Source: Royal Society of Chemistry journal article supplement (doi:10.1039/c3fd00123g), 2014-01-01
Supplement: c3fd00123g1.pdf [file c3fd00123g1.pdf]

---

**Algorithm 1** AddAtomAndConstructChildOctants

---

**Require:** maxDepth, the octree's maximum allowable depth  
**Require:** currentTreeLevel, the octant's current level in the octree  
**Require:** minBoxCoord, the octant's minimum box coordinate  
**Require:** maxBoxCoord, the octant's maximum box coordinate  
**Require:** atomCoord, the coordinates of the atom's centre  
**Require:** atom, the atom object to add  
**Ensure:** filledOctree

```
1: if isOctantNew = true then
2:   octantMinBoxCoord ← minBoxCoord
3:   octantMaxBoxCoord ← maxBoxCoord
4:   octantCentroid ← (minBoxCoord+maxBoxCoord)*0.5
5:   octantRadius ← (minBoxCoord-maxBoxCoord)*0.5
6:   isOctantNew ← false
7: end if
8: childrenTreeLevel ← currentTreeLevel+1
9: // reached a tree leaf node, thus assign to this octant the given atom
10: if childrenTreeLevel > maxDepth then
11:   octantsAtomList.AddEnd(atom)
12:   isOctantNew ← true
13:   return atom added
14: else
15:   for RP = 1 to 8 do
16:     childMinBoxCoord ← get the min box coordinates for child octant
       childOctant<RP>
17:     childMaxBoxCoord ← get the max box coordinates for child octant
       childOctant<RP>
18:     if atomCoord intersect/being enclosed by childMinBoxCoord and child-
       MaxBoxCoord then
19:       if childOctant<RP> has not been created then
20:         childOctant<RP> ← create new Octant Node
21:         isOctantALeaf ← false
22:         // add this child at the end of the octant's children list
23:         octantsChildrenList.AddEnd(childOctant<RP>)
24:       end if
25:       // forward/add the atom to childOctant<RP> octants recursively
26:       return childOctant<RP>.AddAtomAndConstructChildOctants(maxDepth,
       childrenTreeLevel, childMinBoxCoord, childMaxBoxCoord, atom-
       Coord, atom)
27:     end if
28:   end for
29: end if
30: end
```

---

---

**Algorithm 2** DeriveInteractingAtomPairsSet

---

**Require:**  $T_{New}$ , the combined viewing transformation matrix  
**Require:** octree1Octant, an octant from the first octree structure  
**Require:** octree2Octant, an octant from the second octree structure  
**Require:** cutoff, the cut-off distance  
**Ensure:**  $S_{Pairs}$

- 1: retValue  $\leftarrow$  false
- 2: **if** both octree1Octant AND octree2Octant are leaf-octants **then**
- 3:   **for** all atoms  $a_r$  in octree1Octant and all atoms  $a_l$  in octree2Octant **do**
- 4:      $d_{atoms} \leftarrow$  compute inter-atomic distance between  $a_r$  and  $a_l$
- 5:     **if**  $d_{atoms} \leq$  cutoff **then**
- 6:       save pair  $(a_r, a_l)$  in  $S_{Pairs}$
- 7:       retValue  $\leftarrow$  true
- 8:     **end if**
- 9:   **end for**
- 10: **else**
- 11:   **if** octree1Octant OR octree2Octant is a leaf-octant **then**
- 12:     // set non-leaf octant to tmpNLOctant and leaf octant to tmpOctant
- 13:     **if** octree1Octant is a leaf-octant **then**
- 14:       tmpNLOctant  $\leftarrow$  octree2Octant
- 15:       tmpOctant  $\leftarrow$  octree1Octant
- 16:     **else**
- 17:       tmpNLOctant  $\leftarrow$  octree1Octant
- 18:       tmpOctant  $\leftarrow$  octree2Octant
- 19:     **end if**
- 20:     **for** all child octants  $oct_c$  in tmpNLOctant **do**
- 21:        $d_{Net} \leftarrow$  compute net distance between  $oct_c$  and tmpOctant
- 22:       **if**  $d_{Net} \leq$  (cutoff+ $e_s$ ) **then**
- 23:         **if** DeriveInteractingAtomPairsSet( $T_{New}$ ,  $oct_c$ , tmpOctant, cutoff) **then**
- 24:         retValue  $\leftarrow$  true
- 25:         **end if**
- 26:       **end if**
- 27:     **end for**
- 28:     **else**
- 29:       **for** all child octants  $oct_r$  in octree1Octant and all child octants  $oct_l$  in octree2Octant **do**
- 30:         update necessary octant coords. (i.e. the shortest octree) with  $T_{New}$
- 31:          $d_{Net} \leftarrow$  compute net distance between  $oct_r$  and  $oct_l$
- 32:         **if**  $d_{Net} \leq$  (cutoff+ $e_s$ ) **then**
- 33:         **if** DeriveInteractingAtomPairsSet( $T_{New}$ ,  $oct_r$ ,  $oct_l$ , cutoff) **then**
- 34:         retValue  $\leftarrow$  true
- 35:         **end if**
- 36:         **end if**
- 37:       **end for**
- 38:     **end if**
- 39: **end if**
- 40: **return** retValue
- 41: **end**

---
